# Supplementary material
Source: MDPI journal article supplement (https://www.mdpi.com/2073-4441/17/23/3332)
Supplement: s1 [file water-3970301-supplementary.pdf › water-3970301-supplementary.pdf]

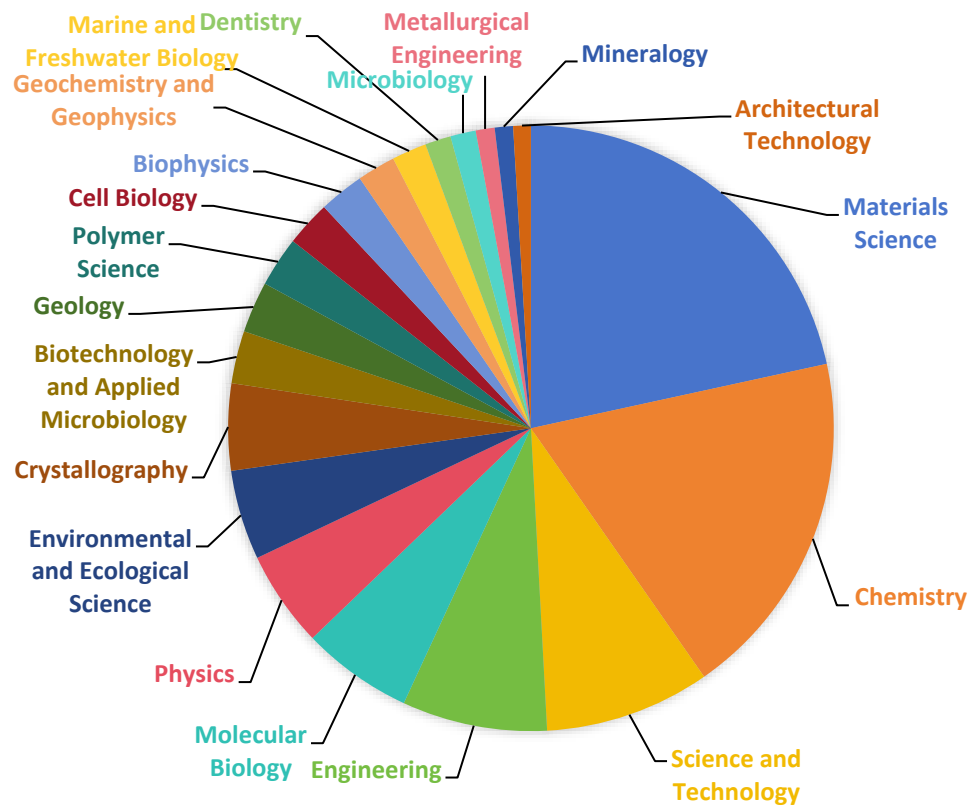

**Figure S1.** Proportion of publications in different research fields

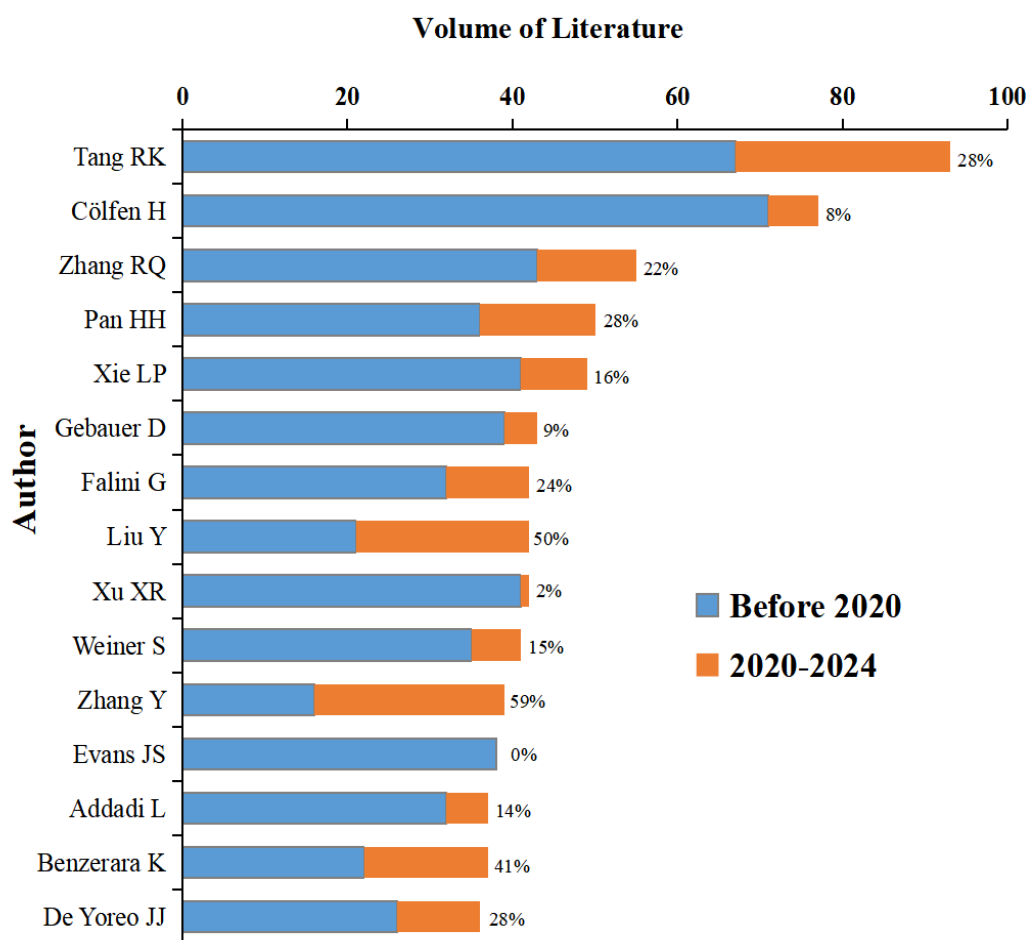

**Figure S2.** Contributions of the author in this field of research (top 15)

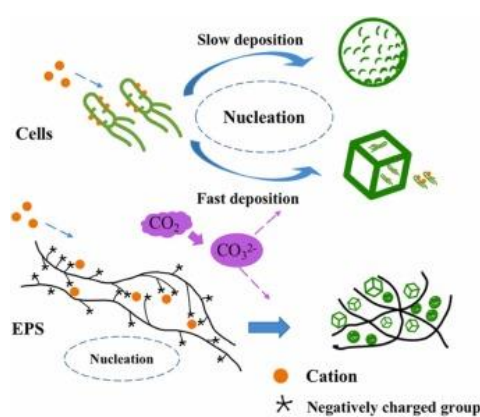

**Figure S3.** The role of bacteria in crystal nucleation

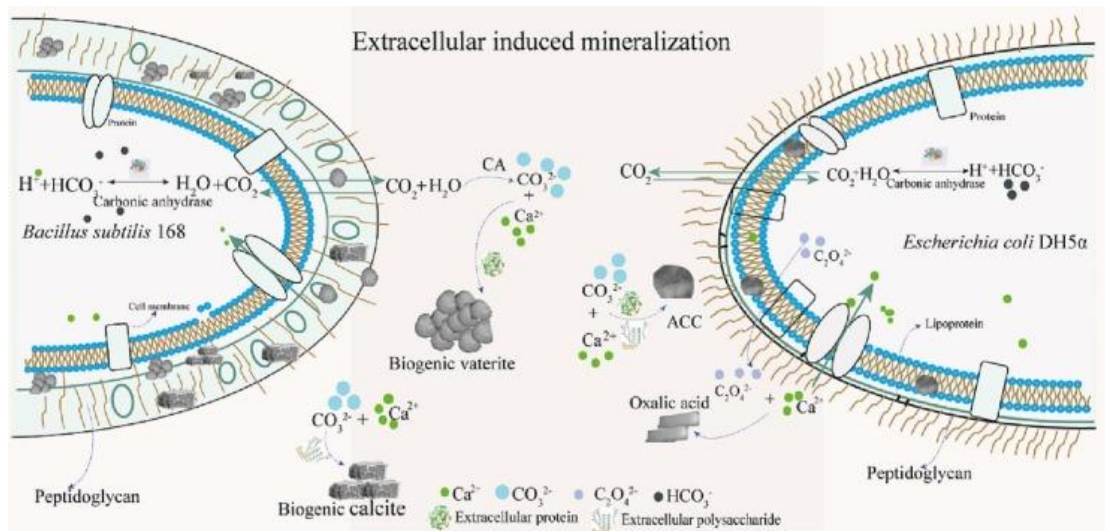

**Figure S4.** Model of calcium carbonate biomineralization induced by *Bacillus subtilis* (left) and *Escherichia coli* (right)
